# Supplementary material
Source: PubMed Central journal article supplement (PMC3993974)
Supplement: NIHMS568949-supplement-Supplementary_Data.pdf [file NIHMS568949-supplement-Supplementary_Data.pdf]

## Supplementary Material – Validation of a Radiosensitivity Molecular Signature in Breast Cancer

**Online Table 1. Clinical Characteristics of Patients**

| <b>Erasmus (n=344)</b>    | <b>N (%)</b> |
|---------------------------|--------------|
| ER_PR <sup>§</sup>        |              |
| ER+/PR+                   | 151 (45.2)   |
| ER-/PR+ or ER+/PR-        | 82 (24.6)    |
| ER-/PR-                   | 101 (30.2)   |
| Size                      |              |
| T1                        | 167 (48.5)   |
| T2, T3 or T4              | 177 (51.5)   |
| Menopause                 |              |
| Premenopausal             | 197 (57.3)   |
| Postmenopausal            | 147 (42.7)   |
| Age                       |              |
| 26-40                     | 51 (14.8)    |
| 41-55                     | 151 (43.9)   |
| 56-70                     | 106 (30.8)   |
| 71-83                     | 36 (10.5)    |
| Surgery                   |              |
| Lumpectomy                | 251 (73.0)   |
| Mastectomy                | 93 (27.0)    |
| RT <sup>†</sup> (yes)     | 282 (82.0)   |
| <hr/>                     |              |
| <b>Karolinska (n=159)</b> | <b>N (%)</b> |
| LN <sup>*</sup>           | 60 (39.0)    |
| ER_PR                     |              |
| ER+/PR+                   | 108 (67.9)   |
| ER-/PR+ or ER+/PR-        | 28 (17.6)    |
| ER-/PR-                   | 23 (14.5)    |
| Size                      |              |
| T1                        | 97 (61.8)    |
| T2, T3 or T4              | 60 (38.2)    |
| Grade <sup>‡</sup>        |              |
| elston 1                  | 28 (19.0)    |
| elston 2                  | 58 (40.0)    |
| elston 3                  | 61 (41.5)    |
| ET <sup>†</sup> (yes)     | 114 (71.7)   |
| CT <sup>†</sup> (yes)     | 30 (18.9)    |
| Surgery <sup>‡</sup>      |              |
| Segmentectomy             | 42 (26.8)    |
| Mastectomy                | 115 (73.2)   |
| RT <sup>†</sup> (yes)     | 77 (48.4)    |

<sup>†</sup>ET=endocrine therapy, CT=chemotherapy, RT=radiation therapy

<sup>‡</sup>Grade: 4 Missing data points

<sup>§</sup>Erasmus ER\_PR: 10 missing data points

\*Karolinska LN+: 5 missing data points

‡Karolinska Grade: 12 missing data points

‡Karolinska Surgery: 2 missing data points

Numbers may not add to 100 because of rounding

**Online Table 2. Distribution of Recurrences by Group**

|                              | <b>Local-<br/>regional</b> | <b>Distant</b> |
|------------------------------|----------------------------|----------------|
| <b>RT patients (n=77)</b>    |                            |                |
| Radiosensitive (n=20)        | 0                          | 1              |
| Radioresistant (n=57)        | 2                          | 16             |
| <b>No RT patients (n=82)</b> |                            |                |
| Radiosensitive (n=28)        | 5                          | 3              |
| Radioresistant (n=54)        | 3                          | 10             |
